# Supplementary material
Source: HighWire-hosted journal article supplement (https://jnm.snmjournals.org/highwire/filestream/94893/field_highwire_adjunct_files/0/171249_Supplemental_Data.pdf)
Supplement: 171249_Supplemental_Data.pdf [file 171249_Supplemental_Data.pdf]

Supplemental Table 1. itG <sup>68</sup>Ge/<sup>68</sup>Ga elution parameters

| <b><u><sup>68</sup>Ge/<sup>68</sup>Ga Generator Use</u></b>                                           |            |                        |              |                       |              |                            |                           |         |
|-------------------------------------------------------------------------------------------------------|------------|------------------------|--------------|-----------------------|--------------|----------------------------|---------------------------|---------|
| Generator Lot:                                                                                        | GaG 14-049 |                        |              | Calibration Date      | Manufacturer | Expiry                     |                           |         |
| Calibration:                                                                                          | 55.135     | mCi                    |              | 6/12/2014             | ITG, Germany | 6/12/2015                  |                           |         |
|                                                                                                       | 2040       | MBq                    |              |                       |              |                            |                           |         |
| Generator will be eluted with 0.05 M HCl (6 mL) once a week for performance evaluation                |            |                        |              |                       |              |                            |                           |         |
| <sup>68</sup> Ga activity measured in a Capintec Dose Calibrator                                      |            |                        |              |                       |              |                            |                           |         |
| <sup>68</sup> Ge break through determined 24 hours after the total decay of <sup>68</sup> Ga activity |            |                        |              |                       |              |                            |                           |         |
| Date of Elution                                                                                       | Time       | <sup>68</sup> Ge (mCi) | Vol HCl (mL) | <sup>68</sup> Ga      |              | <sup>68</sup> Ga yield (%) | <sup>68</sup> Ge Leakage* |         |
|                                                                                                       |            |                        |              | Eluted Activity (mCi) | mCi/mL       |                            | (μCi)                     | % Ge-68 |
| 7/7/2014                                                                                              | 10:00      | 51.67                  | 6.0          | 45.34                 | 7.56         | 87.7                       | 2.91                      | 0.0056  |
| 7/8/2014                                                                                              | 10:05      | 51.538                 | 6.0          | 49.03                 | 8.17         | 95.1                       | 2.62                      | 0.0051  |
| 7/8/2014                                                                                              | 2:30       | 51.538                 | 6.0          | 47.62                 | 7.94         | 92.4                       | 3.09                      | 0.0060  |
| 7/14/2014                                                                                             | 10:10      | 50.753                 | 6.0          | 47.47                 | 7.91         | 93.5                       | 2.58                      | 0.0051  |
| 7/21/2014                                                                                             | 10:00      | 49.853                 | 6.0          | 46.25                 | 7.71         | 92.8                       | 2.46                      | 0.0049  |
| 7/28/2014                                                                                             | 10:00      | 48.968                 | 6.0          | 45.66                 | 7.61         | 93.2                       | 2.61                      | 0.0053  |
| 8/19/2014                                                                                             | 10:15      | 46.29                  | 6.0          | 42.01                 | 7.00         | 90.8                       | 2.2                       | 0.0048  |
| 8/25/2014                                                                                             | 11:00      | 45.585                 | 6.0          | 41.71                 | 6.95         | 91.5                       | 2.39                      | 0.0052  |
| 9/2/2014                                                                                              | 10:30      | 44.678                 | 6.0          | 39.905                | 6.65         | 89.3                       | 2.29                      | 0.0051  |
| 9/8/2014                                                                                              | 9:00       | 44.006                 | 6.0          | 38.884                | 6.48         | 88.4                       | 2.21                      | 0.0050  |
| 9/15/2014                                                                                             | 9:45       | 43.222                 | 6.0          | 37.348                | 6.22         | 86.4                       | 2.15                      | 0.0050  |
| 9/22/2014                                                                                             | 15:00      | 42.455                 | 6.0          | 37.948                | 6.32         | 89.4                       | 2.05                      | 0.0048  |
| 9/29/2014                                                                                             | 15:00      | 41.678                 | 6.0          | 37.276                | 6.21         | 89.4                       | 1.98                      | 0.0048  |
| 10/6/2014                                                                                             | 13:30      | 40.946                 | 6.0          | 35.927                | 5.99         | 87.7                       | 2.01                      | 0.0049  |
| 10/13/2014                                                                                            | 14:00      | 40.217                 | 6.0          | 35.214                | 5.87         | 87.6                       | 1.81                      | 0.0045  |
| 10/20/2014                                                                                            | 14:30      | 39.501                 | 6.0          | 34.395                | 5.73         | 87.1                       | 1.77                      | 0.0045  |
| 10/27/2014                                                                                            | 14:20      | 38.801                 | 6.0          | 33.958                | 5.66         | 87.5                       | 1.68                      | 0.0043  |
| 11/3/2014                                                                                             | 15:00      | 38.11                  | 6.0          | 32.797                | 5.47         | 86.1                       | 1.6                       | 0.0042  |
| 11/10/2014                                                                                            | 15:00      | 37.434                 | 6.0          | 31.88                 | 5.31         | 85.2                       | 1.78                      | 0.0048  |
| 11/14/2014                                                                                            | 13:00      | 37.061                 | 6.0          | 31.385                | 5.23         | 84.7                       | 1.51                      | 0.0041  |
| 11/17/2014                                                                                            | 11:30      | 36.784                 | 6.0          | 30.53                 | 5.09         | 83.0                       | 1.5                       | 0.0041  |
| 11/25/2014                                                                                            | 9:30       | 36.047                 | 6.0          | 30.79                 | 5.13         | 85.4                       | 1.43                      | 0.0040  |
| 12/1/2014                                                                                             | 9:30       | 35.498                 | 6.0          | 29.74                 | 4.96         | 83.8                       | 1.39                      | 0.0039  |
| 12/9/2014                                                                                             | 3:30       | 34.757                 | 6.0          | 29.24                 | 4.87         | 84.1                       | 1.33                      | 0.0038  |
| 12/18/2014                                                                                            | 10:00      | 33.986                 | 6.0          | 27.23                 | 4.54         | 80.1                       | 1.13                      | 0.0033  |
| 12/23/2014                                                                                            | 13:30      | 33.541                 | 6.0          | 27.67                 | 4.61         | 82.5                       | 1.1                       | 0.0033  |
| 12/29/2014                                                                                            | 13:40      | 33.03                  | 6.0          | 27.25                 | 4.54         | 82.5                       | 1.09                      | 0.0033  |

|                  |       |         |     |       |      |      |      |        |
|------------------|-------|---------|-----|-------|------|------|------|--------|
| <b>1/5/2015</b>  | 10:30 | 32.455  | 6.0 | 26.08 | 4.35 | 80.4 | 1.03 | 0.0032 |
| <b>1/7/2015</b>  | 10:20 | 32.29   | 6.0 | 25.43 | 4.24 | 78.8 | 0.94 | 0.0029 |
| <b>1/13/2015</b> | 9:30  | 31.801  | 6.0 | 25.6  | 4.27 | 80.5 | 0.9  | 0.0028 |
| <b>1/15/2015</b> | 14:30 | 31.622  | 6.0 | 25.44 | 4.24 | 80.5 | 0.83 | 0.0026 |
| <b>1/20/2015</b> | 12:00 | 31.229  | 6.0 | 25.22 | 4.20 | 80.8 | 0.8  | 0.0026 |
| <b>1/21/2015</b> | 14:30 | 31.141  | 6.0 | 25.26 | 4.21 | 81.1 | 0.81 | 0.0026 |
| <b>1/22/2015</b> | 15:00 | 31.06   | 6.0 | 24.05 | 4.01 | 77.4 | 0.76 | 0.0024 |
| <b>1/26/2015</b> | 10:00 | 30.76   | 6.0 | 24.09 | 4.02 | 78.3 | 0.73 | 0.0024 |
| <b>1/30/2015</b> | 11:00 | 30.444  | 6.0 | 23.79 | 3.97 | 78.1 | 0.73 | 0.0024 |
| <b>2/2/2015</b>  | 14:45 | 30.199  | 6.0 | 23.85 | 3.98 | 79.0 | 0.69 | 0.0023 |
| <b>2/3/2015</b>  | 15:30 | 30.119  | 6.0 | 23.51 | 3.92 | 78.1 | 0.69 | 0.0023 |
| <b>2/4/2015</b>  | 15:30 | 30.042  | 6.0 | 23.61 | 3.94 | 78.6 | 0.66 | 0.0022 |
| <b>2/5/2015</b>  | 15:45 | 29.9649 | 6.0 | 23.36 | 3.89 | 78.0 | 0.69 | 0.0023 |
| <b>2/10/2015</b> | 15:30 | 29.585  | 6.0 | 22.66 | 3.78 | 76.6 | 0.6  | 0.0020 |
| <b>2/11/2015</b> | 15:20 | 29.51   | 6.0 | 22.52 | 3.75 | 76.3 | 0.58 | 0.0020 |
| <b>2/18/2015</b> | 10:30 | 29.001  | 6.0 | 22.48 | 3.75 | 77.5 | 0.58 | 0.0020 |
| <b>2/19/2015</b> | 15:45 | 28.911  | 6.0 | 22.1  | 3.68 | 76.4 | 0.59 | 0.0020 |
| <b>2/20/2015</b> | 15:30 | 28.838  | 6.0 | 21.8  | 3.63 | 75.6 | 0.55 | 0.0019 |
| <b>2/23/2015</b> | 10:00 | 28.634  | 6.0 | 22.4  | 3.73 | 78.2 | 0.53 | 0.0019 |
| <b>2/24/2015</b> | 14:45 | 28.547  | 6.0 | 22.01 | 3.67 | 77.1 | 0.52 | 0.0018 |
| <b>2/25/2015</b> | 14:20 | 28.475  | 6.0 | 21.27 | 3.55 | 74.7 | 0.5  | 0.0018 |
| <b>2/26/2015</b> | 14:30 | 28.402  | 6.0 | 21.22 | 3.54 | 74.7 | 0.5  | 0.0018 |
| <b>3/3/2015</b>  | 15:30 | 28.038  | 6.0 | 21.97 | 3.66 | 78.4 | 0.48 | 0.0017 |
| <b>3/6/2015</b>  | 14:30 | 27.827  | 6.0 | 20.79 | 3.47 | 74.7 | 0.48 | 0.0017 |
| <b>3/10/2015</b> | 10:20 | 27.556  | 6.0 | 21.22 | 3.54 | 77.0 | 0.48 | 0.0017 |
| <b>3/16/2015</b> | 14:30 | 27.124  | 6.0 | 20.84 | 3.47 | 76.8 | 0.44 | 0.0016 |
| <b>3/20/2015</b> | 15:25 | 26.846  | 6.0 | 20.55 | 3.43 | 76.5 | 0.43 | 0.0016 |
| <b>3/25/2015</b> | 16:15 | 26.502  | 6.0 | 20.23 | 3.37 | 76.3 | 0.43 | 0.0016 |
| <b>3/31/2015</b> | 15:20 | 26.101  | 6.0 | 19.65 | 3.28 | 75.3 | 0.43 | 0.0016 |
| <b>4/2/2015</b>  | 15:35 | 25.967  | 6.0 | 19.6  | 3.27 | 75.5 | 0.41 | 0.0016 |
| <b>4/6/2015</b>  | 15:20 | 25.704  | 6.0 | 19.82 | 3.30 | 77.1 | 0.41 | 0.0016 |
| <b>4/8/2015</b>  | 14:55 | 25.574  | 6.0 | 18.93 | 3.16 | 74.0 | 0.4  | 0.0016 |
| <b>4/13/2015</b> | 16:00 | 25.246  | 6.0 | 19.01 | 3.17 | 75.3 | 0.4  | 0.0016 |
| <b>4/16/2015</b> | 9:30  | 25.07   | 6.0 | 18.42 | 3.07 | 73.5 | 0.38 | 0.0015 |
| <b>4/21/2015</b> | 14:05 | 24.74   | 6.0 | 18.41 | 3.07 | 74.4 | 0.39 | 0.0016 |
| <b>4/24/2015</b> | 13:20 | 24.553  | 6.0 | 18.39 | 3.07 | 74.9 | 0.37 | 0.0015 |
| <b>4/27/2015</b> | 13:00 | 24.366  | 6.0 | 17.99 | 3.00 | 73.8 | 0.36 | 0.0015 |
| <b>4/28/2015</b> | 13:40 | 24.302  | 6.0 | 18.02 | 3.00 | 74.2 | 0.35 | 0.0014 |
| <b>4/29/2015</b> | 16:00 | 24.234  | 6.0 | 17.71 | 2.95 | 73.1 | 0.33 | 0.0014 |
| <b>4/30/2015</b> | 14:00 | 24.177  | 6.0 | 17.47 | 2.91 | 72.3 | 0.33 | 0.0014 |
| <b>5/4/2015</b>  | 15:20 | 23.928  | 6.0 | 18.15 | 3.03 | 75.9 | 0.33 | 0.0014 |
| <b>5/5/2015</b>  | 14:10 | 23.87   | 6.0 | 17.64 | 2.94 | 73.9 | 0.31 | 0.0013 |
| <b>5/6/2015</b>  | 15:10 | 23.806  | 6.0 | 17.13 | 2.86 | 72.0 | 0.32 | 0.0013 |

---

|                  |       |        |     |       |      |      |      |        |
|------------------|-------|--------|-----|-------|------|------|------|--------|
| <b>5/11/2015</b> | 10:30 | 23.515 | 6.0 | 17.47 | 2.91 | 74.3 | 0.31 | 0.0013 |
| <b>5/12/2015</b> | 13:45 | 23.447 | 6.0 | 17.07 | 2.85 | 72.8 | 0.3  | 0.0013 |
| <b>5/18/2015</b> | 13:30 | 23.091 | 6.0 | 17.12 | 2.85 | 74.1 | 0.28 | 0.0012 |

---

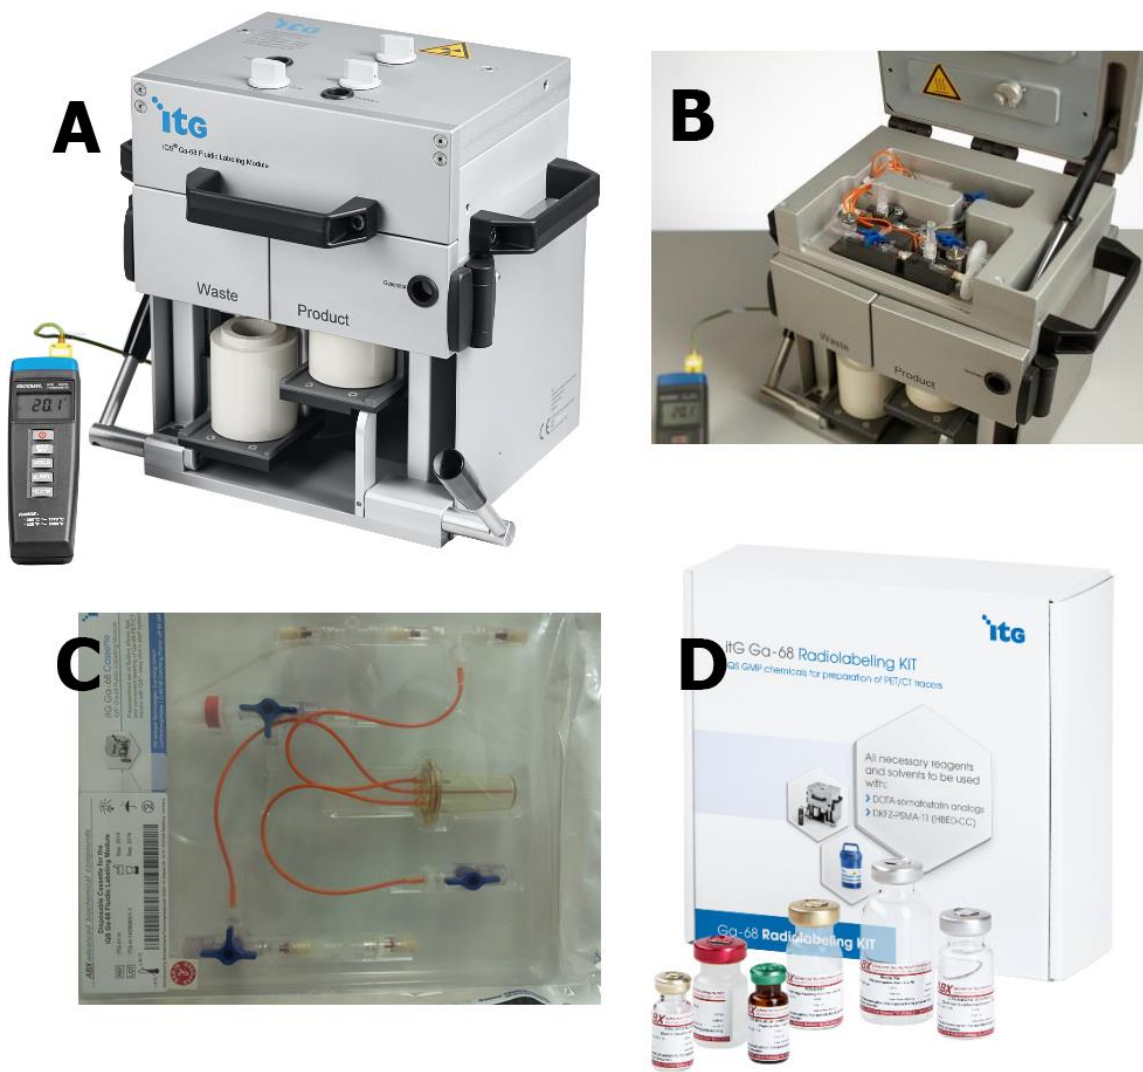

Supplemental Fig. 1.  $^{68}\text{Ga}$  Labeling System. A: IQS labeling Module; IQS Module with open top exposing the fluidics; C: Fluidic Cassette supplied by ITM-AG; and D: Peptide labeling kit supplied by ITM-AG

**A**

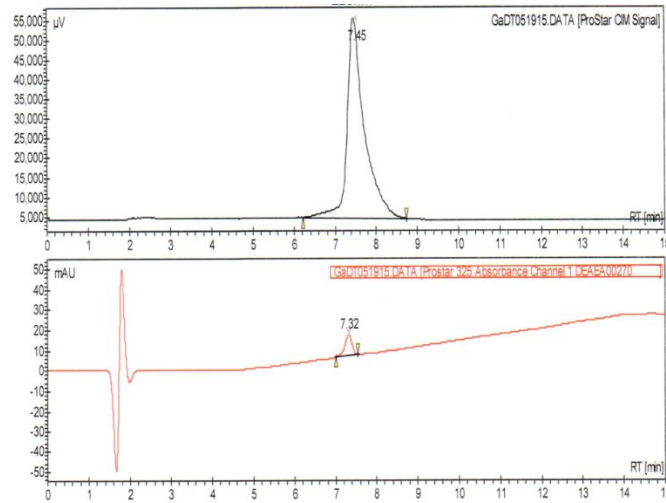

**B**

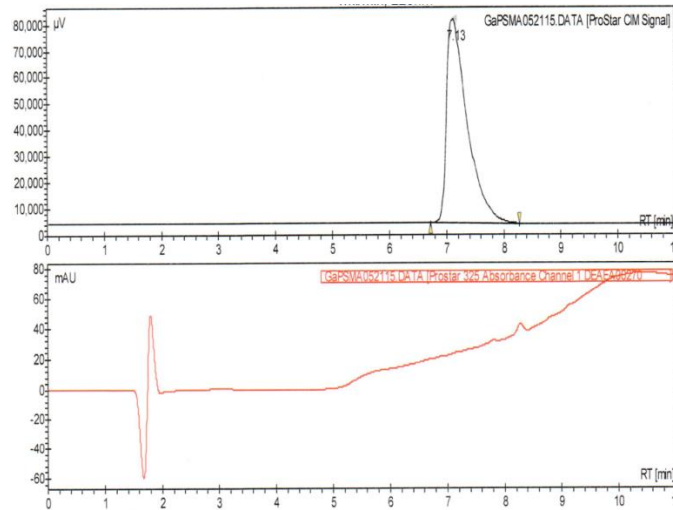

Supplemental Fig 2. Quality Control HPLC of two random drug products A:  $^{68}\text{Ga}$ -DOTATOC and B:  $^{68}\text{Ga}$ -PSMA-HBED-CC.

Supplemental Table 2. HPLC Conditions for HPLC Quality Control:

| Column                          |    |    | Flow                          | Solvent A                    | Solvent B        |
|---------------------------------|----|----|-------------------------------|------------------------------|------------------|
| Waters NovaPak C18 4.6 x 150 mm |    |    | 1 ml/min                      | 0.1% TFA in H <sub>2</sub> O | 0.1% TFA in MeCN |
| <sup>68</sup> Ga-DOTATOC        |    |    | <sup>68</sup> Ga-PSMA-HBED-CC |                              |                  |
| Time                            | %A | %B | Time                          | %A                           | %B               |
| 0:00                            | 82 | 18 | 0:00                          | 100                          | 0                |
| 2:00                            | 82 | 18 | 2:00                          | 100                          | 0                |
| 11:00                           | 40 | 60 | 8:00                          | 0                            | 100              |
| 14:00                           | 40 | 60 | 10:00                         | 0                            | 100              |
| 15:00                           | 82 | 18 | 11:00                         | 100                          | 0                |

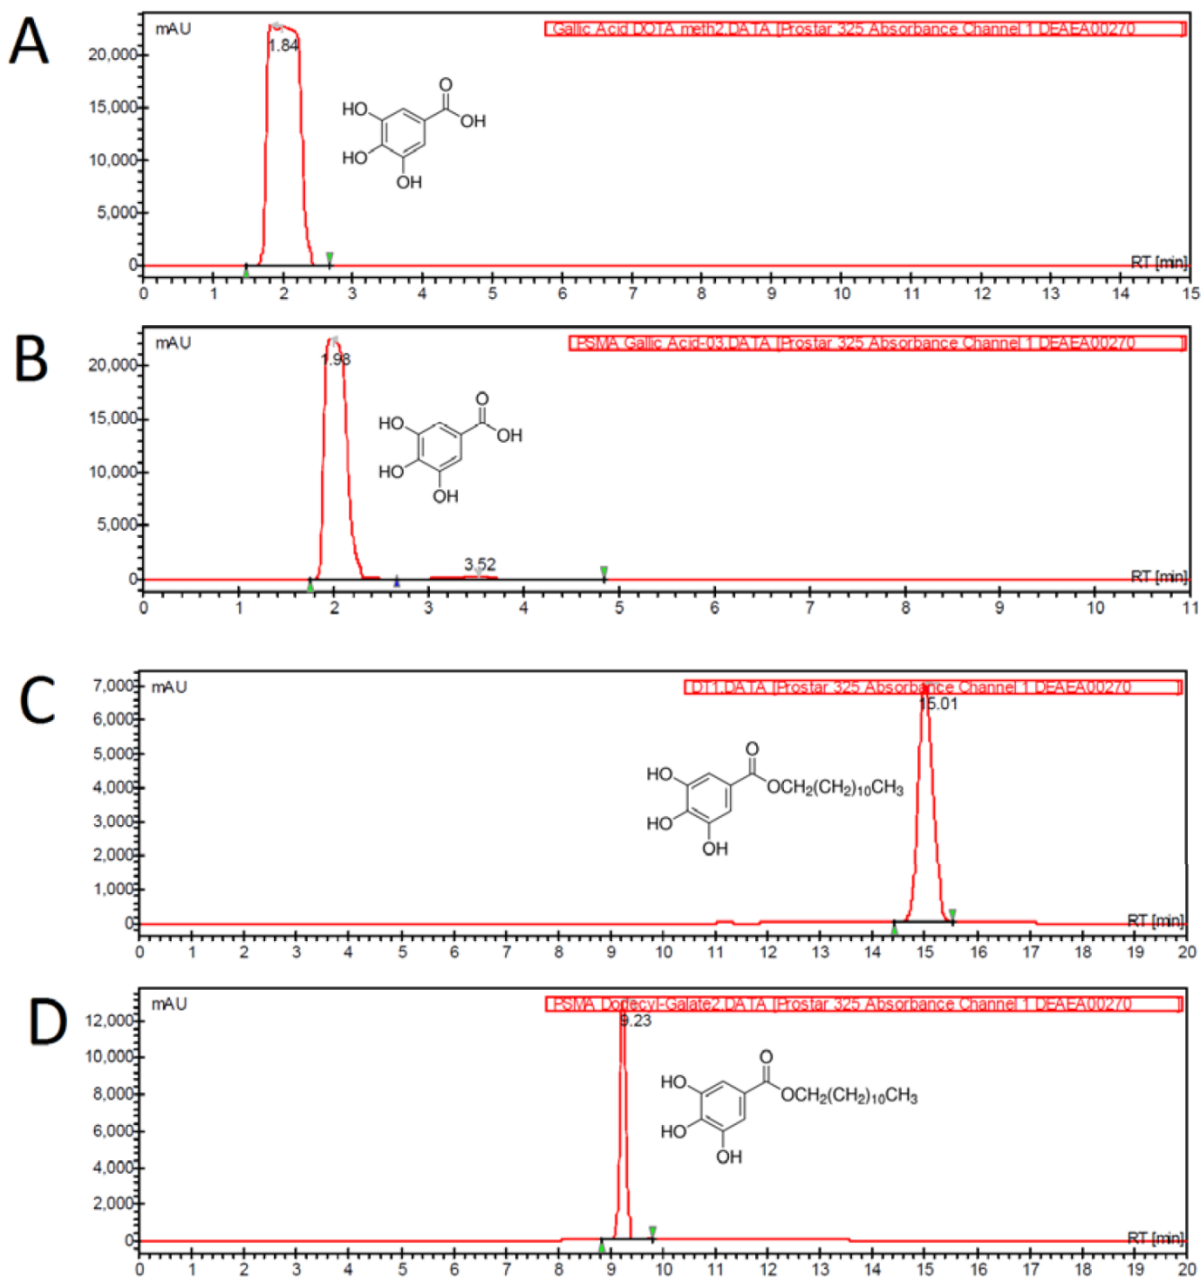

Supplemental Fig 3. HPLC retention time of possible  $^{68}\text{Ge}/^{68}\text{Ga}$  generator radiolysis products: A: Gallic Acid using the  $^{68}\text{Ga}$ -DOTATOC HPLC QC method; B: Gallic Acid using the  $^{68}\text{Ga}$ -PSMA-HBED-CC HPLC QC method; C: Dodecyl Gallate using the  $^{68}\text{Ga}$ -DOTATOC HPLC QC method; and D: Dodecyl Gallate using the  $^{68}\text{Ga}$ -PSMA-HBED-CC HPLC QC method.
